# Supplementary material for: Paper-Based Humidity Sensor for Respiratory Monitoring
Source: MDPI journal article supplement (doi:10.3390/ma15186447), 2022-09-16
Supplement: s1 [file s1]

# Supporting Information

## Paper-based humidity sensor for respiratory monitoring

Xiaoxiao Ma<sup>†</sup>, Shaoxing Zhang<sup>†</sup>, Peikai Zou, Ruya Li\*, Yubo Fan\*

### 1. Establishment of paper wettability model

#### 1.1. The relationship between resistance of the sensor and water film thickness

According to the law of resistance,

$$R = \rho \frac{l}{S} \quad (S1)$$

where  $R$  is the resistance of the conductor,  $l$  and  $S$  are the conductor length and cross-sectional area in the direction of the current, and  $\rho$  is the resistivity of the conductor material. For PHS, the conductor is the paper fiber composite between the interdigital electrodes. The length of the PHS conductor is fork finger spacing, which is represented by  $d$ . The conductor cross-sectional area is that of the water layer condensates on the fiber in the composite. To calculate the cross-section area of the water layer, while printing paper can be seen as an isotropic fiber composite, the following equation is introduced:

$$A_f = \frac{1}{2\pi} V_f \quad (S2)$$

where  $A_f$  is the area fraction of the fiber sectional area on a paper section, and  $V_f$  is the volume fraction of the fiber, which can be calculated from known paper parameters and fiber density. By combining the above parameters and formulas, the relationship between resistance  $R$  and water layer thickness  $t$  is obtained,

$$R = \frac{\rho d r^2}{L h A_f ((r+t)^2 - r^2)} \quad (S3)$$

where  $d$  and  $L$  are the interfinger gap width and interfinger gap length of the interdigital electrode,  $h$  is the thickness of paper,  $r$  is the average radius of paper fiber, and  $A_f$  is the fiber

area fraction of the paper composite, and  $\rho$  is the resistivity of water.

### 1.2. The relationship between water film thickness and relative humidity

Water condensation theory was used to explain the condensation of vapor on hydrophilic paper fibers. Theoretically, four types of intermolecular forces, including hydration, electrostatic, van der Waals forces, and elastic strain, are taken into account [S1]. The disjoining pressure is introduced to evaluate the force, which can be calculated as

$$P(t) = \frac{Ue^{-t/\lambda}}{\lambda} \left(1 + \frac{t}{\lambda} + \frac{\lambda^2}{t^2}\right) + 64k_B T \rho_\infty \gamma^2 e^{-\kappa t} - \frac{A}{6\pi t^3} - \frac{E\epsilon_0^2}{2} e^{-t/\lambda} \quad (S4)$$

and the meaning of each parameter will be explained later.

According to Israelachvili's theory of intermolecular and surface force in 1992, the disjoining pressure can also be written as [S2]

$$P(t) = -\frac{k_B T}{v} \ln \psi \quad (S5)$$

By combining the above two formulas, we can get the relationship between relative humidity and water layer thickness  $t$  on the fiber surface as

$$\psi = \exp \left\{ -\alpha \left[ \frac{Ue^{-t/\lambda}}{\lambda} \left(1 + \frac{t}{\lambda} + \frac{\lambda^2}{t^2}\right) + \beta e^{-\kappa t} - \delta \frac{1}{t^3} - \eta e^{-t/\lambda} \right] \right\} \quad (S6)$$

where  $\psi$  is the relative humidity,  $U$  is the free energy parameter in hydration energy,  $\lambda$  is the length scale parameter in hydration energy, and  $\kappa$  is the reciprocal of Debye length.  $\alpha = v/k_B T$  is a constant related to the volume of a water molecule  $v$ , Boltzmann constant  $k_B$ , and Kelvin temperature  $T$ .  $\beta = 64k_B T \rho_\infty \gamma^2$  is a constant related to  $k_B$ ,  $T$ , the concentration of the solution far away from the surface  $\rho_\infty$  and  $\gamma$  is given by  $\gamma = \tanh(e\phi_0/4k_B T)$ .  $\delta$  is in direct proportion to Hamaker constant  $A$ .  $\eta = E\epsilon_0^2/2$  is related to elastic modulus  $E$  and permittivity of vacuum  $\epsilon_0$ .

## 2. Supplementary Table

| Product or Literature                         | Physiological Parameter           | Wearability                       | Distinguishing between oral and nasal breathing signals |
|-----------------------------------------------|-----------------------------------|-----------------------------------|---------------------------------------------------------|
| PHS (this article)                            | Humidity                          | Stuck to skin                     | ✓                                                       |
| Sleep tracking pad [S3]                       | Body movement                     | Placed under mattress             | ×                                                       |
| Respiration monitor belt [S4]                 | Gas pressure                      | Pressurized and tied to the waist | ×                                                       |
| Smart facemask [S5]                           | CO <sub>2</sub> gas concentration | Mask                              | ×                                                       |
| Intelligent facemask [S6]                     | Airflow                           | Mask                              | ×                                                       |
| Patch based on accelerator and gyroscope [S7] | Body movement                     | Stuck to skin                     | ×                                                       |
| Ultrathin Flexible Sensor [S8]                | Temperature                       | Inserted into nasal cavity        | ×                                                       |
| Smart Textile [S9]                            | Body movement                     | Tied to the chest                 | ×                                                       |

**Supplementary Table S1.** Comparing PHS with existing respiratory monitoring products and methods in literature.

### 3. Supplementary Figure

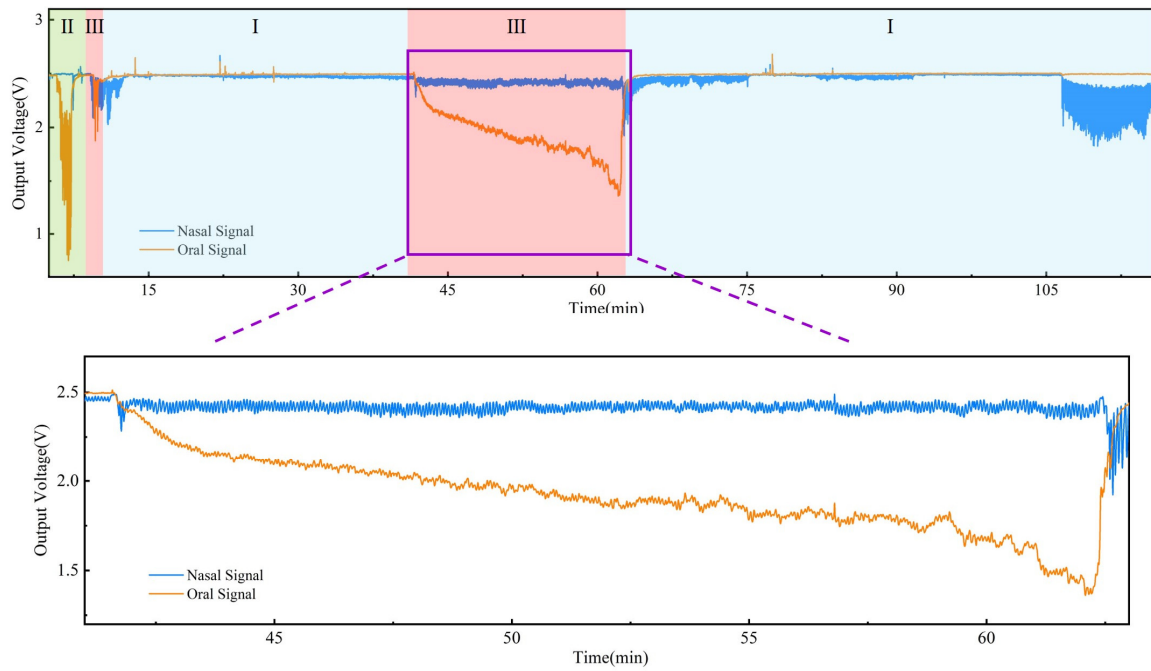

**Supplementary Figure S1.** Periodic and regular respiratory waveforms in both oral and nasal signals when the signal drifts. Overall signals of sleep test on healthy volunteer with local magnified image of the drift signal.

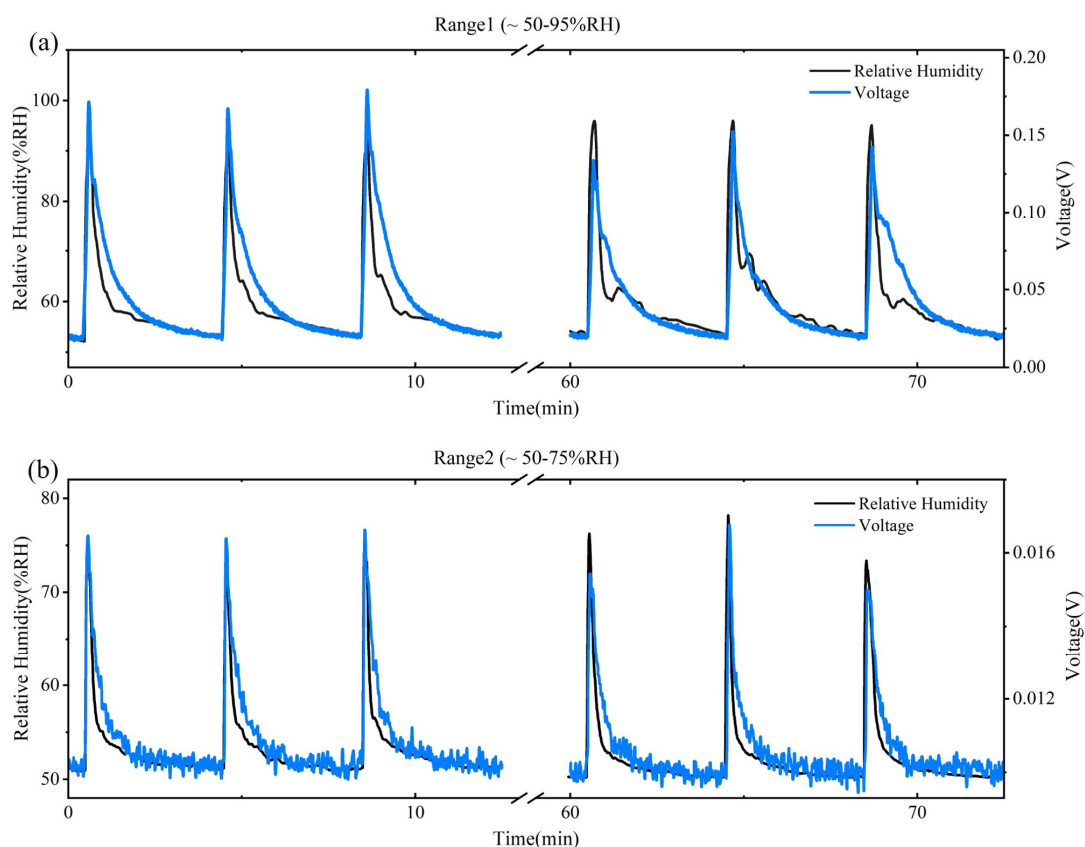

**Supplementary Figure S2.** Repeatability of 80gsm PHS. Sensor response to periodically varying relative humidity signals in different ranges of (a) ~ 50 - 95%RH and (b) ~ 50 - 75%RH.

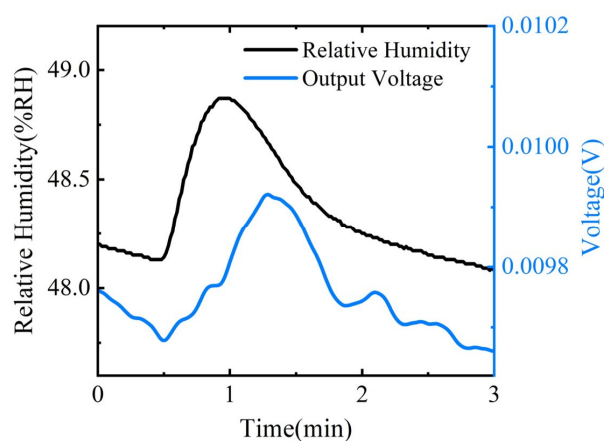

**Supplementary Figure S3.** Sensor detection limit experiment. Sensor's response to slight relative humidity changes of 0.74%RH.

## References

- [S1] Majumdar, A., and I. Mezic. "Instability of ultra-thin water films and the mechanism of droplet formation on hydrophilic surfaces." (1999): 964-971.
- [S2] Israelachvili, Jacob N. Intermolecular and surface forces. Academic Press, 2011.
- [S3] Edouard, Paul, et al. "Validation of the Withings Sleep Analyzer, an under-the-mattress device for the detection of moderate-severe sleep apnea syndrome." *Journal of Clinical Sleep Medicine* 17.6 (2021): 1217-1227.
- [S4] Asadi, Ali, et al. "Inducing Changes in Breathing Patterns Using a Soft Robot." *Proceedings of the 2022 ACM/IEEE International Conference on Human-Robot Interaction*. 2022.
- [S5] Escobedo, P., et al. "Smart facemask for wireless CO2 monitoring." *Nature communications* 13.1 (2022): 1-12.
- [S6] Lu, Qixin, et al. "Intelligent facemask based on triboelectric nanogenerator for respiratory monitoring." *Nano Energy* 91 (2022): 106612.
- [S7] Wang, Sikai, et al. "A new physiological signal acquisition patch designed with advanced respiration monitoring algorithm based on 3-axis accelerator and gyroscope." *2018 40th Annual International Conference of the IEEE Engineering in Medicine and Biology Society (EMBC)*. IEEE, 2018.
- [S8] Zhang, Haodong, et al. "A Wearable Ultrathin Flexible Sensor Inserted Into Nasal Cavity for Precise Sleep Respiratory Monitoring." *IEEE Transactions on Electron Devices* 68.8 (2021): 4090-4097.
- [S9] Massaroni, Carlo, et al. "Smart textile based on piezoresistive sensing elements for respiratory monitoring." *IEEE Sensors Journal* 19.17 (2019): 7718-7725.
